# Supplementary material for: Population structure of Neisseria gonorrhoeae based on whole genome data and its relationship with antibiotic resistance
Source: PeerJ. 2015 Mar 5;3:e806. doi: 10.7717/peerj.806 (PMC4358642; doi:10.7717/peerj.806)
Supplement: Data S1 [file peerj-03-806-s002.xlsx]

## Sheet: Sheet1
Strain Name	Locale	Date	MLST	Azithromycin(MIC)	Cefexime(MIC)	Tetracycline(MIC)	mtr operon promoter mutations present	mtrR mutations Present	Mosaic penA present	ponA mutation present	penB mutation present	tetM present	rpsJ mutation present
CH811	Chile	1982	1583	0.25	0.008	2	0	1	0	0	1	0	1
GC1-182	Canada	1982	1583	0.5	0.008	4	0	1	0	0	0	0	1
SK708	Canada	2006	1594	1	0.016	0.5	0	0	0	0	0	0	0
SK1902	Canada	2006	10935	0.25	0.002	256	0	0	0	0	0	1	1
SK6987	Canada	2006	10010	1	0.016	4	1	1	0	1	0	0	1
SK7461	Canada	2008	1901	0.5	0.032	8	1	0	0	1	0	0	1
SK7842	Canada	2006	10010	1	0.016	8	1	1	0	0	0	0	1
SK8976	Canada	2006	1594	0.06	0.004	2	0	0	0	1	0	0	0
SK12684	Canada	2006	31129	0.5	0.016	8	0	1	0	1	0	0	1
SK33414	Canada	2007	1928	0.25	0.008	4	0	0	0	0	0	0	1
SK14515	Canada	2005	1893	0.25	0.016	2	0	1	0	0	0	0	1
SK15454	Canada	2007	1585	0.06	0.004	2	0	1	0	0	0	0	0
SK16259	Canada	2007	1893	0.125	0.008	4	0	1	0	0	1	0	1
SK16942	Canada	2005	1893	0.125	0.016	2	0	1	0	0	0	0	1
SK17973	Canada	2006	1893	1	0.016	8	0	1	0	1	0	0	1
SK22871	Canada	2007	8122	0.125	0.004	4	1	0	0	0	0	0	1
SK23020	Canada	2006	1901	0.25	0.125	16	1	0	1	1	0	0	1
SK28355	Canada	2007	1893	0.25	0.016	4	0	0	0	1	0	0	1
SK29344	Canada	2007	10010	0.125	0.008	4	1	0	0	1	0	0	1
SK29471	Canada	2005	1893	0.25	0.016	2	0	0	0	1	0	0	1
SK32402	Canada	2007	8153	0.5	0.016	4	1	0	0	1	0	0	1
SK36809	Canada	2007	8126	2	0.008	8	0	1	0	0	0	0	1
SK39420	Canada	2008	1585	0.5	0.016	0.5	0	1	0	0	1	0	0
ALB0303	USA	2011	1588	0.03	0.015	16	0	1	0	1	1	1	1
ALB0403	USA	2011	1901	1	0.125	4	1	0	1	1	0	1	1
ATL0103	USA	2011	10931	0.5	0.015	0.25	1	1	0	1	0	0	0
ALB0102	USA	2011	1901	0.25	0.06	2	1	0	0	1	0	0	1
ATL0105	USA	2011	1588	0.06	0.015	0.25	0	1	0	1	1	1	1
ATL0108	USA	2011	1584	0.03	0.015	0.25	0	0	0	1	1	0	1
ATL0117	USA	2011	10932	0.125	0.015	16	0	1	0	0	1	1	1
ATL0121	USA	2011	1902	0.5	0.03	1	1	0	0	0	0	0	1
ATL0125	USA	2011	1901	0.25	0.015	1	1	0	1	1	0	0	1
ATL0508	USA	2011	1585	0.06	0.015	16	0	0	0	0	0	0	0
ATL0513	USA	2011	1893	0.25	0.03	2	0	1	0	0	0	0	1
MIA0202	USA	2011	1901	0.5	0.03	2	1	0	0	0	0	0	1
MIA0309	USA	2011	1931	0.125	0.015	16	0	0	0	0	0	1	1
MIA0310	USA	2011	1584	0.03	0.015	16	0	0	0	0	1	0	1
MIA0510	USA	2011	1901	1	0.03	2	0	0	0	1	0	0	1
MIA0515	USA	2011	1901	0.25	0.03	16	1	0	0	1	0	0	1
MIA0516	USA	2011	1901	0.5	0.06	8	1	0	0	1	0	0	1
NOR0306	USA	2011	1583	0.25	0.015	2	0	1	0	0	1	1	1
NYC0507	USA	2011	1901	0.25	0.06	2	1	1	0	0	0	0	1
NYC0513	USA	2011	1901	0.25	0.06	4	1	1	0	0	0	0	1
MUNG1	Canada	1991	10934	0.125	0.016	0.25	0	0	0	1	1	0	0
MUNG3	Japan	2003	7363	0.25	0.5	2	1	1	1	1	1	0	1
MUNG4	Japan	1996	1590	0.5	0.25	4	1	1	1	1	1	0	1
MUNG5	Philipines	1992	1901	0.25	0.016	1	1	0	1	1	0	0	1
MUNG6	Australia	2001	10008	0.125	0.016	16	0	0	0	1	1	0	0
MUNG8	USA	2001	8127	2	0.016	0.5	0	0	0	0	0	0	1
MUNG9	Sweden	2010	1901	0.75	3	2	1	0	1	1	0	0	1
MUNG12	Norway	2010	1901	0.5	0.19	3	1	0	1	1	0	0	1
MUNG14	Norway	2010	1901	0.38	0.25	3	1	0	1	1	0	0	1
MUNG15	Austria	2011	1901	0.19	1	2	1	0	1	1	0	0	1
MUNG17	Sweden	2010	1892	0.75	0.38	2	0	0	0	0	0	0	0
MUNG18	Norway	2010	10933	0.125	0.016	1.5	0	1	0	1	0	0	1
MUNG19	Sweden	2010	1580	1	0.016	1.5	0	1	0	0	0	0	1
MUNG20	Sweden	2013	7363	0.25	0.38	1.5	1	1	1	1	1	0	1
MUNG21	Pakistan	2008	1902	1	0.032	2	1	0	0	1	0	0	1
MUNG23	Sweden	1998	1585	0.064	0.016	0.125	0	1	0	0	0	0	0
MUNG25	Sweden	1998	1901	0.125	0.016	0.5	1	0	0	1	1	0	1
MUNG26	Sweden	1999	1584	0.064	0.016	0.5	0	0	0	0	0	0	1
