# Supplementary material for: Population structure of Neisseria gonorrhoeae based on whole genome data and its relationship with antibiotic resistance
Source: PeerJ. 2015 Mar 5;3:e806. doi: 10.7717/peerj.806 (PMC4358642; doi:10.7717/peerj.806)
Supplement: Data S3 [file peerj-03-806-s004.xls]

## Sheet: Supplement_S4
ID	Protein	GO term	Function
1003	tat (twin-arginine translocation) pathway signal sequence domain protein	GO:0004180	carboxypeptidase activity	F
1003	tat (twin-arginine translocation) pathway signal sequence domain protein	GO:0006508	proteolysis	P
1004	nitrite copper-containing	GO:0005507	copper ion binding	F
1004	nitrite copper-containing	GO:0006807	nitrogen compound metabolic process	P
1004	nitrite copper-containing	GO:0009279	cell outer membrane	C
1004	nitrite copper-containing	GO:0050421	nitrite reductase (NO-forming) activity	F
1004	nitrite copper-containing	GO:0055114	oxidation-reduction process	P
1007	3-phosphoserine aminotransferase	GO:0005737	cytoplasm	C
1007	3-phosphoserine aminotransferase	GO:0030170	pyridoxal phosphate binding	F
1007	3-phosphoserine aminotransferase	GO:0004648	O-phospho-L-serine:2-oxoglutarate aminotransferase activity	F
1007	3-phosphoserine aminotransferase	GO:0006564	L-serine biosynthetic process	P
1007	3-phosphoserine aminotransferase	GO:0008615	pyridoxine biosynthetic process	P
1013	amino acid carrier family protein	GO:0015655	alanine:sodium symporter activity	F
1013	amino acid carrier family protein	GO:0016020	membrane	C
1013	amino acid carrier family protein	GO:0006814	sodium ion transport	P
1013	amino acid carrier family protein	GO:0032328	alanine transport	P
1059	abgt transporter family protein	GO:1902604	p-aminobenzoyl-glutamate transmembrane transport	P
1059	abgt transporter family protein	GO:0015558	p-aminobenzoyl-glutamate uptake transmembrane transporter activity	F
1101	macrolide export atp-binding permease protein	GO:0055085	transmembrane transport	P
1101	macrolide export atp-binding permease protein	GO:0046677	response to antibiotic	P
1101	macrolide export atp-binding permease protein	GO:0006200	ATP catabolic process	P
1101	macrolide export atp-binding permease protein	GO:0043190	ATP-binding cassette (ABC) transporter complex	C
1101	macrolide export atp-binding permease protein	GO:0005524	ATP binding	F
1101	macrolide export atp-binding permease protein	GO:0016820	hydrolase activity, acting on acid anhydrides, catalyzing transmembrane movement of substances	F
1101	macrolide export atp-binding permease protein	GO:0042895	antibiotic transporter activity	F
1101	macrolide export atp-binding permease protein	GO:0016887	ATPase activity	F
1101	macrolide export atp-binding permease protein	GO:0042891	antibiotic transport	P
1102	efflux rnd mfp subunit	GO:0016020	membrane	C
1102	efflux rnd mfp subunit	GO:0055085	transmembrane transport	P
1102	efflux rnd mfp subunit	GO:0009306	protein secretion	P
1111	natural resistance-associated macrophage family protein	GO:0004815	aspartate-tRNA ligase activity	F
1111	natural resistance-associated macrophage family protein	GO:0008152	metabolic process	P
1113	purine biosynthesis protein purh	GO:0004643	phosphoribosylaminoimidazolecarboxamide formyltransferase activity	F
1113	purine biosynthesis protein purh	GO:0006189	'de novo' IMP biosynthetic process	P
1113	purine biosynthesis protein purh	GO:0003937	IMP cyclohydrolase activity	F
1138	pyridoxine 5 -phosphate synthase	GO:0005737	cytoplasm	C
1138	pyridoxine 5 -phosphate synthase	GO:0008615	pyridoxine biosynthetic process	P
1138	pyridoxine 5 -phosphate synthase	GO:0033856	pyridoxine 5'-phosphate synthase activity	F
1140	chorismate mutase	GO:0005737	cytoplasm	C
1140	chorismate mutase	GO:0046417	chorismate metabolic process	P
1140	chorismate mutase	GO:0004106	chorismate mutase activity	F
1140	chorismate mutase	GO:0016597	amino acid binding	F
1140	chorismate mutase	GO:0009094	L-phenylalanine biosynthetic process	P
1140	chorismate mutase	GO:0004664	prephenate dehydratase activity	F
1146	2-methylcitrate synthase citrate synthase ii family protein	GO:0046912	transferase activity, transferring acyl groups, acyl groups converted into alkyl on transfer	F
1146	2-methylcitrate synthase citrate synthase ii family protein	GO:0005737	cytoplasm	C
1146	2-methylcitrate synthase citrate synthase ii family protein	GO:0006099	tricarboxylic acid cycle	P
1146	2-methylcitrate synthase citrate synthase ii family protein	GO:0044262	cellular carbohydrate metabolic process	P
1152	udp-n-acetylmuramate--alanine ligase	GO:0007049	cell cycle	P
1152	udp-n-acetylmuramate--alanine ligase	GO:0008360	regulation of cell shape	P
1152	udp-n-acetylmuramate--alanine ligase	GO:0051301	cell division	P
1152	udp-n-acetylmuramate--alanine ligase	GO:0009252	peptidoglycan biosynthetic process	P
1152	udp-n-acetylmuramate--alanine ligase	GO:0005524	ATP binding	F
1152	udp-n-acetylmuramate--alanine ligase	GO:0008763	UDP-N-acetylmuramate-L-alanine ligase activity	F
1152	udp-n-acetylmuramate--alanine ligase	GO:0005737	cytoplasm	C
1159	udp-n-acetylmuramoylalanyl-d-glutamate-- -diaminopimelate ligase	GO:0007049	cell cycle	P
1159	udp-n-acetylmuramoylalanyl-d-glutamate-- -diaminopimelate ligase	GO:0008360	regulation of cell shape	P
1159	udp-n-acetylmuramoylalanyl-d-glutamate-- -diaminopimelate ligase	GO:0008765	UDP-N-acetylmuramoylalanyl-D-glutamate-2,6-diaminopimelate ligase activity	F
1159	udp-n-acetylmuramoylalanyl-d-glutamate-- -diaminopimelate ligase	GO:0051301	cell division	P
1159	udp-n-acetylmuramoylalanyl-d-glutamate-- -diaminopimelate ligase	GO:0009252	peptidoglycan biosynthetic process	P
1159	udp-n-acetylmuramoylalanyl-d-glutamate-- -diaminopimelate ligase	GO:0005524	ATP binding	F
1159	udp-n-acetylmuramoylalanyl-d-glutamate-- -diaminopimelate ligase	GO:0005737	cytoplasm	C
1160	penicillin-binding protein 2	GO:0008658	penicillin binding	F
1160	penicillin-binding protein 2	GO:0007049	cell cycle	P
1160	penicillin-binding protein 2	GO:0046677	response to antibiotic	P
1160	penicillin-binding protein 2	GO:0008360	regulation of cell shape	P
1160	penicillin-binding protein 2	GO:0051301	cell division	P
1160	penicillin-binding protein 2	GO:0009252	peptidoglycan biosynthetic process	P
1160	penicillin-binding protein 2	GO:0016787	hydrolase activity	F
1160	penicillin-binding protein 2	GO:0008955	peptidoglycan glycosyltransferase activity	F
1160	penicillin-binding protein 2	GO:0005886	plasma membrane	C
1169	exodeoxyribonuclease iii	GO:0004519	endonuclease activity	F
1169	exodeoxyribonuclease iii	GO:0003677	DNA binding	F
1169	exodeoxyribonuclease iii	GO:0005622	intracellular	C
1169	exodeoxyribonuclease iii	GO:0008853	exodeoxyribonuclease III activity	F
1169	exodeoxyribonuclease iii	GO:0000738	DNA catabolic process, exonucleolytic	P
1169	exodeoxyribonuclease iii	GO:0006281	DNA repair	P
1184	glutamine type i	GO:0005737	cytoplasm	C
1184	glutamine type i	GO:0004356	glutamate-ammonia ligase activity	F
1184	glutamine type i	GO:0009399	nitrogen fixation	P
1184	glutamine type i	GO:0005524	ATP binding	F
1184	glutamine type i	GO:0006542	glutamine biosynthetic process	P
1246	adenylosuccinate lyase	GO:0006188	IMP biosynthetic process	P
1246	adenylosuccinate lyase	GO:0004018	N6-(1,2-dicarboxyethyl)AMP AMP-lyase (fumarate-forming) activity	F
1246	adenylosuccinate lyase	GO:0070626	(S)-2-(5-amino-1-(5-phospho-D-ribosyl)imidazole-4-carboxamido)succinate AMP-lyase (fumarate-forming) activity	F
1261	proton-translocating nadh-quinone chain m family protein	GO:0006120	mitochondrial electron transport, NADH to ubiquinone	P
1261	proton-translocating nadh-quinone chain m family protein	GO:0008137	NADH dehydrogenase (ubiquinone) activity	F
1261	proton-translocating nadh-quinone chain m family protein	GO:0016021	integral component of membrane	C
1262	proton-translocating nadh-quinone chain l family protein	GO:0008137	NADH dehydrogenase (ubiquinone) activity	F
1262	proton-translocating nadh-quinone chain l family protein	GO:0016021	integral component of membrane	C
1262	proton-translocating nadh-quinone chain l family protein	GO:0042773	ATP synthesis coupled electron transport	P
1264	nadh-ubiquinone plastoquinone oxidoreductase chain 6 family protein	GO:0055114	oxidation-reduction process	P
1264	nadh-ubiquinone plastoquinone oxidoreductase chain 6 family protein	GO:0008137	NADH dehydrogenase (ubiquinone) activity	F
1267	nadh dehydrogenase g subunit	GO:0051536	iron-sulfur cluster binding	F
1267	nadh dehydrogenase g subunit	GO:0009055	electron carrier activity	F
1267	nadh dehydrogenase g subunit	GO:0008137	NADH dehydrogenase (ubiquinone) activity	F
1267	nadh dehydrogenase g subunit	GO:0030151	molybdenum ion binding	F
1267	nadh dehydrogenase g subunit	GO:0042773	ATP synthesis coupled electron transport	P
1267	nadh dehydrogenase g subunit	GO:0016020	membrane	C
1281	oligopeptidase a	GO:0004222	metalloendopeptidase activity	F
1281	oligopeptidase a	GO:0006508	proteolysis	P
1295	trna uridine 5-carboxymethylaminomethyl modification enzyme	GO:0005737	cytoplasm	C
1295	trna uridine 5-carboxymethylaminomethyl modification enzyme	GO:0050660	flavin adenine dinucleotide binding	F
1295	trna uridine 5-carboxymethylaminomethyl modification enzyme	GO:0016740	transferase activity	F
1295	trna uridine 5-carboxymethylaminomethyl modification enzyme	GO:0002098	tRNA wobble uridine modification	P
1305	outer membrane assembly protein	GO:0043165	Gram-negative-bacterium-type cell outer membrane assembly	P
1305	outer membrane assembly protein	GO:0005886	plasma membrane	C
1305	outer membrane assembly protein	GO:0009279	cell outer membrane	C
1305	outer membrane assembly protein	GO:0016021	integral component of membrane	C
1305	outer membrane assembly protein	GO:0051205	protein insertion into membrane	P
1307	udp-3-o-	GO:0016747	transferase activity, transferring acyl groups other than amino-acyl groups	F
1307	udp-3-o-	GO:0009245	lipid A biosynthetic process	P
1313	membrane protein	GO:0015288	porin activity	F
1313	membrane protein	GO:0005886	plasma membrane	C
1313	membrane protein	GO:0009279	cell outer membrane	C
1313	membrane protein	GO:0055085	transmembrane transport	P
1313	membrane protein	GO:0006811	ion transport	P
1313	membrane protein	GO:0046930	pore complex	C
1329	dna topoisomerase i	GO:0003917	DNA topoisomerase type I activity	F
1329	dna topoisomerase i	GO:0003677	DNA binding	F
1329	dna topoisomerase i	GO:0005524	ATP binding	F
1329	dna topoisomerase i	GO:0000287	magnesium ion binding	F
1329	dna topoisomerase i	GO:0005694	chromosome	C
1329	dna topoisomerase i	GO:0006265	DNA topological change	P
189	atp-dependent helicase	GO:0003676	nucleic acid binding	F
189	atp-dependent helicase	GO:0008026	ATP-dependent helicase activity	F
189	atp-dependent helicase	GO:0006200	ATP catabolic process	P
189	atp-dependent helicase	GO:0005524	ATP binding	F
280	metallo-beta-lactamase superfamily protein	GO:0008152	metabolic process	P
280	metallo-beta-lactamase superfamily protein	GO:0004416	hydroxyacylglutathione hydrolase activity	F
288	d-isomer specific 2-hydroxyacid catalytic domain protein	GO:0051287	NAD binding	F
288	d-isomer specific 2-hydroxyacid catalytic domain protein	GO:0016787	hydrolase activity	F
288	d-isomer specific 2-hydroxyacid catalytic domain protein	GO:0055114	oxidation-reduction process	P
288	d-isomer specific 2-hydroxyacid catalytic domain protein	GO:0008465	glycerate dehydrogenase activity	F
288	d-isomer specific 2-hydroxyacid catalytic domain protein	GO:0033711	4-phosphoerythronate dehydrogenase activity	F
292	mechanosensitive ion channel family protein	GO:0055085	transmembrane transport	P
292	mechanosensitive ion channel family protein	GO:0016020	membrane	C
310	feccd transport family protein	GO:0015688	iron chelate transport	P
310	feccd transport family protein	GO:0015623	iron-chelate-transporting ATPase activity	F
310	feccd transport family protein	GO:0005886	plasma membrane	C
310	feccd transport family protein	GO:0016021	integral component of membrane	C
310	feccd transport family protein	GO:0008152	metabolic process	P
311	tonb-dependent siderophore receptor family protein	GO:0004872	receptor activity	F
311	tonb-dependent siderophore receptor family protein	GO:0015343	siderophore transmembrane transporter activity	F
311	tonb-dependent siderophore receptor family protein	GO:0005506	iron ion binding	F
311	tonb-dependent siderophore receptor family protein	GO:0009279	cell outer membrane	C
311	tonb-dependent siderophore receptor family protein	GO:0044718	siderophore transmembrane transport	P
332	transglycosylase slt domain protein	GO:0008152	metabolic process	P
332	transglycosylase slt domain protein	GO:0016757	transferase activity, transferring glycosyl groups	F
332	transglycosylase slt domain protein	GO:0004553	hydrolase activity, hydrolyzing O-glycosyl compounds	F
332	transglycosylase slt domain protein	GO:0042597	periplasmic space	C
347	glycyl-trna synthetase subunit beta	GO:0006420	arginyl-tRNA aminoacylation	P
347	glycyl-trna synthetase subunit beta	GO:0046872	metal ion binding	F
347	glycyl-trna synthetase subunit beta	GO:0006426	glycyl-tRNA aminoacylation	P
347	glycyl-trna synthetase subunit beta	GO:0005524	ATP binding	F
347	glycyl-trna synthetase subunit beta	GO:0008081	phosphoric diester hydrolase activity	F
347	glycyl-trna synthetase subunit beta	GO:0004814	arginine-tRNA ligase activity	F
347	glycyl-trna synthetase subunit beta	GO:0005737	cytoplasm	C
347	glycyl-trna synthetase subunit beta	GO:0004820	glycine-tRNA ligase activity	F
351	3-oxoacyl-	GO:0006633	fatty acid biosynthetic process	P
351	3-oxoacyl-	GO:0004316	3-oxoacyl-[acyl-carrier-protein] reductase (NADPH) activity	F
351	3-oxoacyl-	GO:0051287	NAD binding	F
351	3-oxoacyl-	GO:0055114	oxidation-reduction process	P
352	gmp synthase	GO:0006541	glutamine metabolic process	P
352	gmp synthase	GO:0003922	GMP synthase (glutamine-hydrolyzing) activity	F
352	gmp synthase	GO:0005524	ATP binding	F
352	gmp synthase	GO:0016740	transferase activity	F
352	gmp synthase	GO:0016462	pyrophosphatase activity	F
352	gmp synthase	GO:0006177	GMP biosynthetic process	P
353	abc transporter permease	GO:0055085	transmembrane transport	P
353	abc transporter permease	GO:0006200	ATP catabolic process	P
353	abc transporter permease	GO:0043190	ATP-binding cassette (ABC) transporter complex	C
353	abc transporter permease	GO:0006869	lipid transport	P
353	abc transporter permease	GO:0005524	ATP binding	F
353	abc transporter permease	GO:0034040	lipid-transporting ATPase activity	F
354	malonyl -acyl carrier protein transacylase	GO:0004314	[acyl-carrier-protein] S-malonyltransferase activity	F
354	malonyl -acyl carrier protein transacylase	GO:0006508	proteolysis	P
354	malonyl -acyl carrier protein transacylase	GO:0008233	peptidase activity	F
401	carbamoyl phosphate synthase small subunit	GO:0004088	carbamoyl-phosphate synthase (glutamine-hydrolyzing) activity	F
401	carbamoyl phosphate synthase small subunit	GO:0006526	arginine biosynthetic process	P
401	carbamoyl phosphate synthase small subunit	GO:0044205	'de novo' UMP biosynthetic process	P
401	carbamoyl phosphate synthase small subunit	GO:0006543	glutamine catabolic process	P
401	carbamoyl phosphate synthase small subunit	GO:0005524	ATP binding	F
401	carbamoyl phosphate synthase small subunit	GO:0070409	carbamoyl phosphate biosynthetic process	P
409	riboflavin kinase	GO:0008531	riboflavin kinase activity	F
409	riboflavin kinase	GO:0009231	riboflavin biosynthetic process	P
409	riboflavin kinase	GO:0016310	phosphorylation	P
409	riboflavin kinase	GO:0003919	FMN adenylyltransferase activity	F
410	isoleucyl-trna synthetase	GO:0004822	isoleucine-tRNA ligase activity	F
410	isoleucyl-trna synthetase	GO:0002161	aminoacyl-tRNA editing activity	F
410	isoleucyl-trna synthetase	GO:0008270	zinc ion binding	F
410	isoleucyl-trna synthetase	GO:0006428	isoleucyl-tRNA aminoacylation	P
410	isoleucyl-trna synthetase	GO:0006450	regulation of translational fidelity	P
410	isoleucyl-trna synthetase	GO:0005524	ATP binding	F
410	isoleucyl-trna synthetase	GO:0005737	cytoplasm	C
419	riboflavin biosynthesis protein	GO:0009231	riboflavin biosynthetic process	P
419	riboflavin biosynthesis protein	GO:0050661	NADP binding	F
419	riboflavin biosynthesis protein	GO:0008703	5-amino-6-(5-phosphoribosylamino)uracil reductase activity	F
419	riboflavin biosynthesis protein	GO:0008835	diaminohydroxyphosphoribosylaminopyrimidine deaminase activity	F
419	riboflavin biosynthesis protein	GO:0008270	zinc ion binding	F
419	riboflavin biosynthesis protein	GO:0055114	oxidation-reduction process	P
420	atp cone domain protein	GO:0008270	zinc ion binding	F
420	atp cone domain protein	GO:0003677	DNA binding	F
420	atp cone domain protein	GO:0005524	ATP binding	F
420	atp cone domain protein	GO:0045892	negative regulation of transcription, DNA-templated	P
441	atp-dependent dna helicase	GO:0003676	nucleic acid binding	F
441	atp-dependent dna helicase	GO:0032508	DNA duplex unwinding	P
441	atp-dependent dna helicase	GO:0004003	ATP-dependent DNA helicase activity	F
441	atp-dependent dna helicase	GO:0005524	ATP binding	F
441	atp-dependent dna helicase	GO:0006310	DNA recombination	P
441	atp-dependent dna helicase	GO:0006281	DNA repair	P
444	hlyd secretion family protein	GO:0016020	membrane	C
444	hlyd secretion family protein	GO:0055085	transmembrane transport	P
444	hlyd secretion family protein	GO:0009306	protein secretion	P
448	yihy family inner membrane domain protein	GO:0016787	hydrolase activity	F
448	yihy family inner membrane domain protein	GO:0008152	metabolic process	P
448	yihy family inner membrane domain protein	GO:0005887	integral component of plasma membrane	C
451	radical sam superfamily protein	GO:0046872	metal ion binding	F
451	radical sam superfamily protein	GO:0016491	oxidoreductase activity	F
451	radical sam superfamily protein	GO:0016840	carbon-nitrogen lyase activity	F
451	radical sam superfamily protein	GO:0051539	4 iron, 4 sulfur cluster binding	F
451	radical sam superfamily protein	GO:0008616	queuosine biosynthetic process	P
451	radical sam superfamily protein	GO:0055114	oxidation-reduction process	P
452	beta-hexosaminidase	GO:0005737	cytoplasm	C
452	beta-hexosaminidase	GO:0004563	beta-N-acetylhexosaminidase activity	F
452	beta-hexosaminidase	GO:0008360	regulation of cell shape	P
452	beta-hexosaminidase	GO:0005975	carbohydrate metabolic process	P
452	beta-hexosaminidase	GO:0009252	peptidoglycan biosynthetic process	P
452	beta-hexosaminidase	GO:0009254	peptidoglycan turnover	P
452	beta-hexosaminidase	GO:0007049	cell cycle	P
452	beta-hexosaminidase	GO:0051301	cell division	P
484	protein-export membrane protein	GO:0015450	P-P-bond-hydrolysis-driven protein transmembrane transporter activity	F
484	protein-export membrane protein	GO:0005622	intracellular	C
484	protein-export membrane protein	GO:0005886	plasma membrane	C
484	protein-export membrane protein	GO:0043952	protein transport by the Sec complex	P
484	protein-export membrane protein	GO:0065002	intracellular protein transmembrane transport	P
484	protein-export membrane protein	GO:0006605	protein targeting	P
484	protein-export membrane protein	GO:0016021	integral component of membrane	C
496	anaerobic ribonucleoside triphosphate reductase	GO:0055114	oxidation-reduction process	P
496	anaerobic ribonucleoside triphosphate reductase	GO:0008998	ribonucleoside-triphosphate reductase activity	F
498	glycosyl transferase 2 family protein	GO:0008152	metabolic process	P
498	glycosyl transferase 2 family protein	GO:0047234	raffinose-raffinose alpha-galactotransferase activity	F
515	radical sam superfamily protein	GO:0005737	cytoplasm	C
515	radical sam superfamily protein	GO:0006779	porphyrin-containing compound biosynthetic process	P
515	radical sam superfamily protein	GO:0004109	coproporphyrinogen oxidase activity	F
515	radical sam superfamily protein	GO:0051536	iron-sulfur cluster binding	F
515	radical sam superfamily protein	GO:0051989	coproporphyrinogen dehydrogenase activity	F
515	radical sam superfamily protein	GO:0055114	oxidation-reduction process	P
516	dna ligase	GO:0006260	DNA replication	P
516	dna ligase	GO:0046872	metal ion binding	F
516	dna ligase	GO:0006266	DNA ligation	P
516	dna ligase	GO:0003911	DNA ligase (NAD+) activity	F
516	dna ligase	GO:0003677	DNA binding	F
516	dna ligase	GO:0006281	DNA repair	P
533	amidophosphoribosyltransferase	GO:0009113	purine nucleobase biosynthetic process	P
533	amidophosphoribosyltransferase	GO:0046872	metal ion binding	F
533	amidophosphoribosyltransferase	GO:0009116	nucleoside metabolic process	P
533	amidophosphoribosyltransferase	GO:0004044	amidophosphoribosyltransferase activity	F
533	amidophosphoribosyltransferase	GO:0006189	'de novo' IMP biosynthetic process	P
540	dimethyladenosine transferase	GO:0005737	cytoplasm	C
540	dimethyladenosine transferase	GO:0031167	rRNA methylation	P
540	dimethyladenosine transferase	GO:0052908	16S rRNA (adenine(1518)-N(6)/adenine(1519)-N(6))-dimethyltransferase activity	F
540	dimethyladenosine transferase	GO:0003723	RNA binding	F
540	dimethyladenosine transferase	GO:0000179	rRNA (adenine-N6,N6-)-dimethyltransferase activity	F
542	peptidase	GO:0016021	integral component of membrane	C
542	peptidase	GO:0005576	extracellular region	C
542	peptidase	GO:0009986	cell surface	C
542	peptidase	GO:0009279	cell outer membrane	C
542	peptidase	GO:0042597	periplasmic space	C
542	peptidase	GO:0006508	proteolysis	P
542	peptidase	GO:0004252	serine-type endopeptidase activity	F
556	threonyl-trna synthetase	GO:0046872	metal ion binding	F
556	threonyl-trna synthetase	GO:0006435	threonyl-tRNA aminoacylation	P
556	threonyl-trna synthetase	GO:0004829	threonine-tRNA ligase activity	F
556	threonyl-trna synthetase	GO:0005524	ATP binding	F
556	threonyl-trna synthetase	GO:0005737	cytoplasm	C
603	hemy family protein	GO:0016020	membrane	C
603	hemy family protein	GO:0042168	heme metabolic process	P
603	hemy family protein	GO:0005515	protein binding	F
620	atp-dependent metallopeptidase family protein	GO:0016021	integral component of membrane	C
620	atp-dependent metallopeptidase family protein	GO:0008270	zinc ion binding	F
620	atp-dependent metallopeptidase family protein	GO:0006200	ATP catabolic process	P
620	atp-dependent metallopeptidase family protein	GO:0051301	cell division	P
620	atp-dependent metallopeptidase family protein	GO:0004222	metalloendopeptidase activity	F
620	atp-dependent metallopeptidase family protein	GO:0006508	proteolysis	P
620	atp-dependent metallopeptidase family protein	GO:0005524	ATP binding	F
620	atp-dependent metallopeptidase family protein	GO:0016887	ATPase activity	F
620	atp-dependent metallopeptidase family protein	GO:0030163	protein catabolic process	P
620	atp-dependent metallopeptidase family protein	GO:0005886	plasma membrane	C
630	udp-n-acetylenolpyruvoylglucosamine reductase	GO:0005737	cytoplasm	C
630	udp-n-acetylenolpyruvoylglucosamine reductase	GO:0008360	regulation of cell shape	P
630	udp-n-acetylenolpyruvoylglucosamine reductase	GO:0050660	flavin adenine dinucleotide binding	F
630	udp-n-acetylenolpyruvoylglucosamine reductase	GO:0008762	UDP-N-acetylmuramate dehydrogenase activity	F
630	udp-n-acetylenolpyruvoylglucosamine reductase	GO:0009252	peptidoglycan biosynthetic process	P
630	udp-n-acetylenolpyruvoylglucosamine reductase	GO:0007049	cell cycle	P
630	udp-n-acetylenolpyruvoylglucosamine reductase	GO:0051301	cell division	P
630	udp-n-acetylenolpyruvoylglucosamine reductase	GO:0055114	oxidation-reduction process	P
639	NA	GO:0005524	ATP binding	F
639	NA	GO:0004176	ATP-dependent peptidase activity	F
639	NA	GO:0019538	protein metabolic process	P
645	phoh-like protein	GO:0005524	ATP binding	F
651	rna pseudouridylate synthase family protein	GO:0003723	RNA binding	F
651	rna pseudouridylate synthase family protein	GO:0001522	pseudouridine synthesis	P
651	rna pseudouridylate synthase family protein	GO:0016829	lyase activity	F
651	rna pseudouridylate synthase family protein	GO:0009982	pseudouridine synthase activity	F
656	outer membrane lipo family protein	GO:0042953	lipoprotein transport	P
656	outer membrane lipo family protein	GO:0006200	ATP catabolic process	P
656	outer membrane lipo family protein	GO:0043190	ATP-binding cassette (ABC) transporter complex	C
656	outer membrane lipo family protein	GO:0042954	lipoprotein transporter activity	F
656	outer membrane lipo family protein	GO:0005524	ATP binding	F
656	outer membrane lipo family protein	GO:0016887	ATPase activity	F
656	outer membrane lipo family protein	GO:0009279	cell outer membrane	C
658	ribose-phosphate pyrophosphokinase	GO:0009156	ribonucleoside monophosphate biosynthetic process	P
658	ribose-phosphate pyrophosphokinase	GO:0009165	nucleotide biosynthetic process	P
658	ribose-phosphate pyrophosphokinase	GO:0006015	5-phosphoribose 1-diphosphate biosynthetic process	P
658	ribose-phosphate pyrophosphokinase	GO:0005524	ATP binding	F
658	ribose-phosphate pyrophosphokinase	GO:0000287	magnesium ion binding	F
658	ribose-phosphate pyrophosphokinase	GO:0016310	phosphorylation	P
658	ribose-phosphate pyrophosphokinase	GO:0016301	kinase activity	F
658	ribose-phosphate pyrophosphokinase	GO:0004749	ribose phosphate diphosphokinase activity	F
658	ribose-phosphate pyrophosphokinase	GO:0005737	cytoplasm	C
659	ribosomal protein ctc-form	GO:0005840	ribosome	C
659	ribosomal protein ctc-form	GO:0008097	5S rRNA binding	F
659	ribosomal protein ctc-form	GO:0003735	structural constituent of ribosome	F
659	ribosomal protein ctc-form	GO:0006412	translation	P
666	replicative dna helicase	GO:0006260	DNA replication	P
666	replicative dna helicase	GO:0003677	DNA binding	F
666	replicative dna helicase	GO:0032508	DNA duplex unwinding	P
666	replicative dna helicase	GO:0003678	DNA helicase activity	F
666	replicative dna helicase	GO:0005524	ATP binding	F
669	type iv pilin	GO:0015627	type II protein secretion system complex	C
669	type iv pilin	GO:0015628	protein secretion by the type II secretion system	P
669	type iv pilin	GO:0008565	protein transporter activity	F
670	deoxyuridine 5 -triphosphate nucleotidohydrolase	GO:0004170	dUTP diphosphatase activity	F
670	deoxyuridine 5 -triphosphate nucleotidohydrolase	GO:0006226	dUMP biosynthetic process	P
670	deoxyuridine 5 -triphosphate nucleotidohydrolase	GO:0046080	dUTP metabolic process	P
670	deoxyuridine 5 -triphosphate nucleotidohydrolase	GO:0000287	magnesium ion binding	F
671	succinyldiaminopimelate aminotransferase	GO:0009016	succinyldiaminopimelate transaminase activity	F
671	succinyldiaminopimelate aminotransferase	GO:0030170	pyridoxal phosphate binding	F
671	succinyldiaminopimelate aminotransferase	GO:0009089	lysine biosynthetic process via diaminopimelate	P
681	pbsx family phage large subunit	GO:0006323	DNA packaging	P
687	cmp-n-acetylneuraminate-beta-galactosamide-alpha- -sialyltransferase	GO:0009103	lipopolysaccharide biosynthetic process	P
687	cmp-n-acetylneuraminate-beta-galactosamide-alpha- -sialyltransferase	GO:0016757	transferase activity, transferring glycosyl groups	F
703	atp-dependent chaperone protein	GO:0005737	cytoplasm	C
703	atp-dependent chaperone protein	GO:0008233	peptidase activity	F
703	atp-dependent chaperone protein	GO:0016485	protein processing	P
703	atp-dependent chaperone protein	GO:0005524	ATP binding	F
703	atp-dependent chaperone protein	GO:0017111	nucleoside-triphosphatase activity	F
703	atp-dependent chaperone protein	GO:0006508	proteolysis	P
703	atp-dependent chaperone protein	GO:0009408	response to heat	P
704	tryptophan--trna ligase	GO:0004830	tryptophan-tRNA ligase activity	F
704	tryptophan--trna ligase	GO:0006436	tryptophanyl-tRNA aminoacylation	P
704	tryptophan--trna ligase	GO:0005524	ATP binding	F
704	tryptophan--trna ligase	GO:0005737	cytoplasm	C
706	ppx phosphatase family protein	GO:0008894	guanosine-5'-triphosphate,3'-diphosphate diphosphatase activity	F
706	ppx phosphatase family protein	GO:0004309	exopolyphosphatase activity	F
706	ppx phosphatase family protein	GO:0006798	polyphosphate catabolic process	P
706	ppx phosphatase family protein	GO:0000287	magnesium ion binding	F
728	succinyl-diaminopimelate desuccinylase	GO:0050897	cobalt ion binding	F
728	succinyl-diaminopimelate desuccinylase	GO:0009089	lysine biosynthetic process via diaminopimelate	P
728	succinyl-diaminopimelate desuccinylase	GO:0019877	diaminopimelate biosynthetic process	P
728	succinyl-diaminopimelate desuccinylase	GO:0008270	zinc ion binding	F
728	succinyl-diaminopimelate desuccinylase	GO:0009014	succinyl-diaminopimelate desuccinylase activity	F
745	scpa b family protein	GO:0005737	cytoplasm	C
745	scpa b family protein	GO:0007049	cell cycle	P
745	scpa b family protein	GO:0051301	cell division	P
745	scpa b family protein	GO:0007059	chromosome segregation	P
749	#NAME?	GO:0004872	receptor activity	F
749	#NAME?	GO:0009279	cell outer membrane	C
749	#NAME?	GO:0006810	transport	P
749	#NAME?	GO:0004127	cytidylate kinase activity	F
749	#NAME?	GO:0016021	integral component of membrane	C
749	#NAME?	GO:0046939	nucleotide phosphorylation	P
749	#NAME?	GO:0005215	transporter activity	F
786	d-lactate dehydrogenase	GO:0050660	flavin adenine dinucleotide binding	F
786	d-lactate dehydrogenase	GO:0005887	integral component of plasma membrane	C
786	d-lactate dehydrogenase	GO:0051287	NAD binding	F
786	d-lactate dehydrogenase	GO:0008762	UDP-N-acetylmuramate dehydrogenase activity	F
786	d-lactate dehydrogenase	GO:0008720	D-lactate dehydrogenase activity	F
786	d-lactate dehydrogenase	GO:0006089	lactate metabolic process	P
786	d-lactate dehydrogenase	GO:0055085	transmembrane transport	P
786	d-lactate dehydrogenase	GO:0055114	oxidation-reduction process	P
787	NA	GO:0055114	oxidation-reduction process	P
787	NA	GO:0051920	peroxiredoxin activity	F
788	acyl- dehydrogenase	GO:0050660	flavin adenine dinucleotide binding	F
788	acyl- dehydrogenase	GO:0004085	butyryl-CoA dehydrogenase activity	F
788	acyl- dehydrogenase	GO:0003995	acyl-CoA dehydrogenase activity	F
788	acyl- dehydrogenase	GO:0055114	oxidation-reduction process	P
803	competence protein	GO:0003723	RNA binding	F
803	competence protein	GO:0070475	rRNA base methylation	P
803	competence protein	GO:0036307	23S rRNA (adenine(2030)-N(6))-methyltransferase activity	F
834	ribonuclease r	GO:0005737	cytoplasm	C
834	ribonuclease r	GO:0003723	RNA binding	F
834	ribonuclease r	GO:0090503	RNA phosphodiester bond hydrolysis, exonucleolytic	P
834	ribonuclease r	GO:0008859	exoribonuclease II activity	F
858	poly a polymerase head domain protein	GO:0004112	cyclic-nucleotide phosphodiesterase activity	F
858	poly a polymerase head domain protein	GO:0016311	dephosphorylation	P
858	poly a polymerase head domain protein	GO:0004810	tRNA adenylyltransferase activity	F
858	poly a polymerase head domain protein	GO:0016437	tRNA cytidylyltransferase activity	F
858	poly a polymerase head domain protein	GO:0052928	CTP:3'-cytidine-tRNA cytidylyltransferase activity	F
858	poly a polymerase head domain protein	GO:0001680	tRNA 3'-terminal CCA addition	P
858	poly a polymerase head domain protein	GO:0042245	RNA repair	P
858	poly a polymerase head domain protein	GO:0016791	phosphatase activity	F
858	poly a polymerase head domain protein	GO:0005524	ATP binding	F
858	poly a polymerase head domain protein	GO:0000287	magnesium ion binding	F
858	poly a polymerase head domain protein	GO:0052929	ATP:3'-cytidine-cytidine-tRNA adenylyltransferase activity	F
858	poly a polymerase head domain protein	GO:0000049	tRNA binding	F
858	poly a polymerase head domain protein	GO:0052927	CTP:tRNA cytidylyltransferase activity	F
873	dna mismatch repair protein	GO:0032300	mismatch repair complex	C
873	dna mismatch repair protein	GO:0005524	ATP binding	F
873	dna mismatch repair protein	GO:0006298	mismatch repair	P
873	dna mismatch repair protein	GO:0030983	mismatched DNA binding	F
877	impb mucb samb family protein	GO:0005737	cytoplasm	C
877	impb mucb samb family protein	GO:0006261	DNA-dependent DNA replication	P
877	impb mucb samb family protein	GO:0003887	DNA-directed DNA polymerase activity	F
877	impb mucb samb family protein	GO:0000287	magnesium ion binding	F
877	impb mucb samb family protein	GO:0003684	damaged DNA binding	F
877	impb mucb samb family protein	GO:0006281	DNA repair	P
895	p-type cation-transporting atpase	GO:0016021	integral component of membrane	C
895	p-type cation-transporting atpase	GO:0004008	copper-exporting ATPase activity	F
895	p-type cation-transporting atpase	GO:0046872	metal ion binding	F
895	p-type cation-transporting atpase	GO:0005524	ATP binding	F
895	p-type cation-transporting atpase	GO:0060003	copper ion export	P
895	p-type cation-transporting atpase	GO:0008152	metabolic process	P
924	trna pseudouridine synthase b	GO:0009982	pseudouridine synthase activity	F
924	trna pseudouridine synthase b	GO:0003723	RNA binding	F
924	trna pseudouridine synthase b	GO:0016829	lyase activity	F
924	trna pseudouridine synthase b	GO:0031119	tRNA pseudouridine synthesis	P
948	lysm domain protein	GO:0016757	transferase activity, transferring glycosyl groups	F
948	lysm domain protein	GO:0016798	hydrolase activity, acting on glycosyl bonds	F
948	lysm domain protein	GO:0008152	metabolic process	P
968	primosomal replication protein n	GO:0003697	single-stranded DNA binding	F
968	primosomal replication protein n	GO:1990077	primosome complex	C
968	primosomal replication protein n	GO:0006269	DNA replication, synthesis of RNA primer	P
977	peptidase m23 family protein	GO:0008152	metabolic process	P
977	peptidase m23 family protein	GO:0016787	hydrolase activity	F
986	aspartate ammonia-lyase	GO:0006531	aspartate metabolic process	P
986	aspartate ammonia-lyase	GO:0006099	tricarboxylic acid cycle	P
986	aspartate ammonia-lyase	GO:0008797	aspartate ammonia-lyase activity	F
